# Supplementary material
Source: MDPI journal article supplement (https://www.mdpi.com/2075-163X/11/7/784)
Supplement: s1 [file s1]

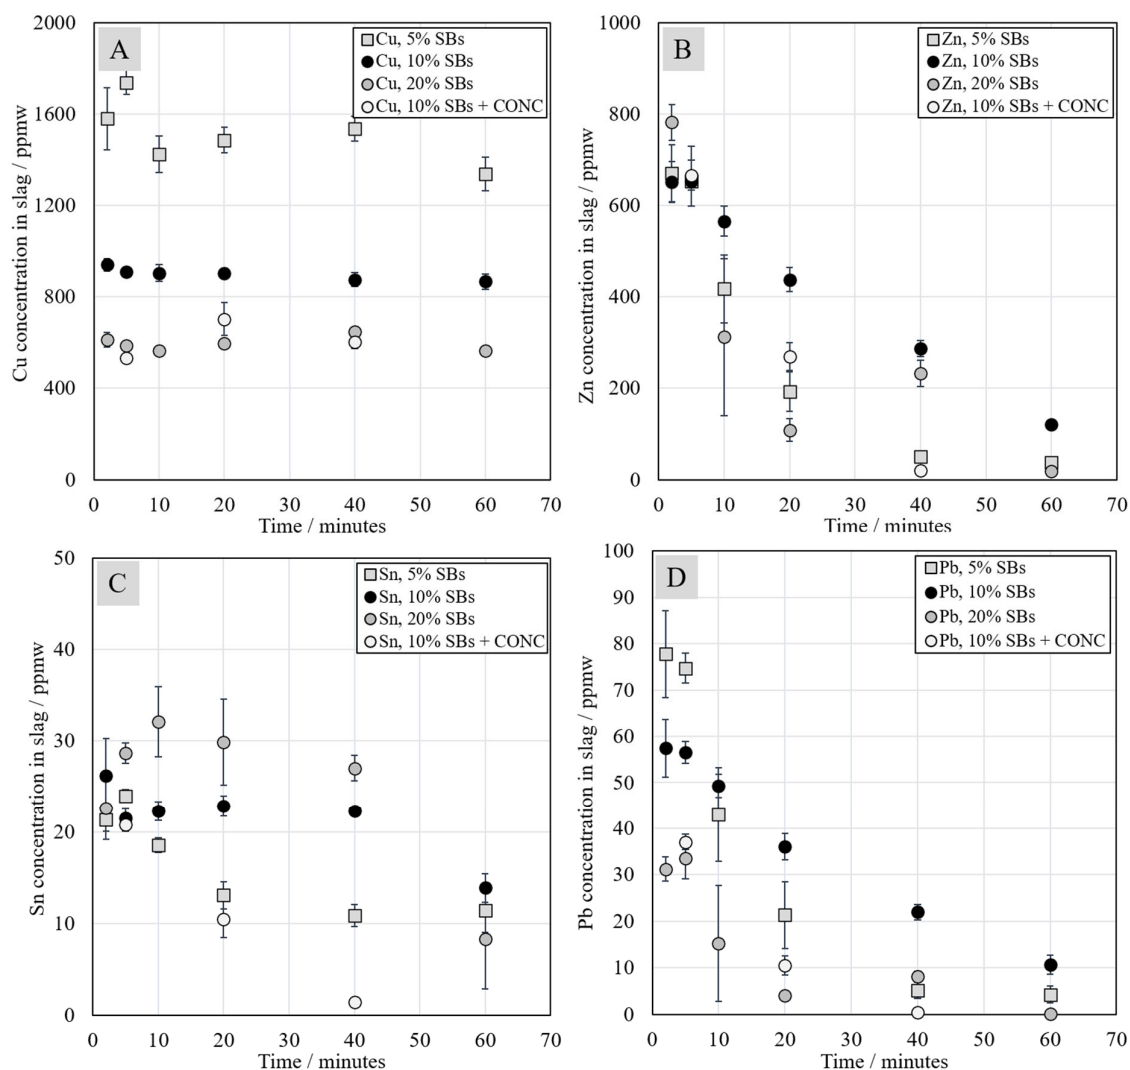

**Figure S1.** Chemical concentrations of Cu (A), Zn (B), Sn (C), and Pb (D) in the slags as a function of contact time.

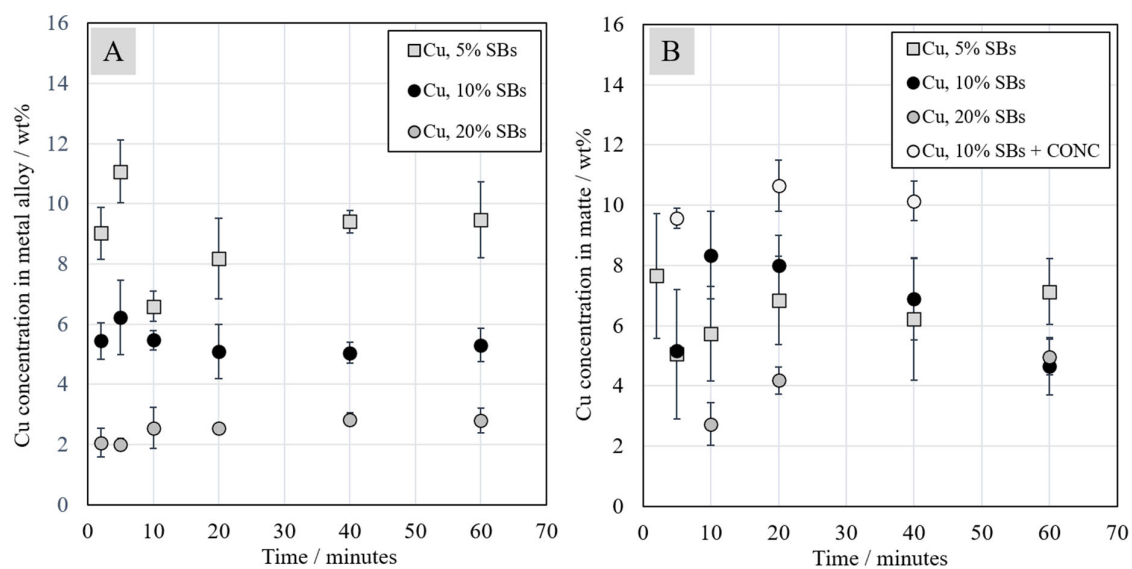

**Figure S2.** Copper concentration in the metal alloy (**A**) and in the matte (**B**) as a function of contact time.
